# Supplementary material for: Multi-Omics Integration for Liver Cancer Using Regression Analysis
Source: MDPI journal article supplement (doi:10.3390/cimb46040222), 2024-04-19
Supplement: s1 [file s1]

**Supplementary Table S1. Total number of samples for tumor and control.**

| <b>Type</b> | <b>RNA-seq</b> | <b>DNA-met</b> | <b>CNV</b> |
|-------------|----------------|----------------|------------|
| Tumour      | 371            | 377            | 371        |
| Control     | 52             | 52             | 86         |

**Supplementary Table S2. Different combination of omics data using linear and logistic regression models.**

| Regression Type | Coefficients                                                    | P-values                                                                       | Derived Empirical Formula                                                                                                                                                                                                                                                                                              |
|-----------------|-----------------------------------------------------------------|--------------------------------------------------------------------------------|------------------------------------------------------------------------------------------------------------------------------------------------------------------------------------------------------------------------------------------------------------------------------------------------------------------------|
| Linear          | $\alpha_0 : 0.607$<br>$\alpha_2 : 0.17$                         | $p_{\alpha_0} : 0.331$<br>$p_{\alpha_2} : 0.52$                                | Not statistically significant integration<br>$y = 0.17 (RNA - seq) + 0.607 (CNV)$<br>$y = 0.17 (RNA - seq)$                                                                                                                                                                                                            |
| Logistic        | $\beta_0 : 0.887$<br>$\beta_2 : -2.607$                         | $p_{\beta_0} : 0.475$<br>$p_{\beta_2} : 0.219$                                 | Not statistically significant integration<br>$y = (1 + \exp(-0.8 (CNV)))^{-1}$<br>$y = (1 + \exp(2.6 (RNA - seq)))^{-1}$<br>$y = (1 + \exp(-0.8 (CNV) + 2.6 (RNA - seq)))^{-1}$                                                                                                                                        |
| Linear          | $\alpha_0 : 0.317$<br>$\alpha_1 : 3.34$                         | $p_{\alpha_0} : \mathbf{0.00161}$<br>$p_{\alpha_1} : \mathbf{0.00129}$         | Statistically significant integration<br>$y = 0.3(CNV) + 3.3(DNA - met)$<br>$y = 3.3(DNA - met)$                                                                                                                                                                                                                       |
| Logistic        | $\beta_0 : -0.997$<br>$\beta_1 : -61.959$                       | $p_{\beta_0} : \mathbf{0.00456}$<br>$p_{\beta_1} : \mathbf{0.00482}$           | Statistically significant integration<br>$y = (1 + \exp(0.9(CNV) + 61.9(DNA - met)))^{-1}$<br>$y = (1 + \exp(61.9(DNA - met)))^{-1}$                                                                                                                                                                                   |
| Linear          | $\alpha_2 : 0.379$<br>$\alpha_1 : 3.756$                        | $p_{\alpha_2} : 0.000379$<br>$p_{\alpha_1} : 0.001057$                         | Statistically significant integration<br>$y = 0.3(RNA - seq) + 3.7(DNA - met)$<br>$y = 0.3(RNA - seq)$<br>$y = 3.7(DNA - met)$                                                                                                                                                                                         |
| Logistic        | $\beta_2 : -40.8$<br>$\beta_1 : 154.2$                          | $p_{\beta_2} : 0.152$<br>$p_{\beta_1} : 0.152$                                 | Not Statistically Significant integration<br>$y = (1 + \exp(40.8(RNA - seq) - 154.2(DNA - met)))^{-1}$<br>$y = (1 + \exp(-154.2(DNA - met)))^{-1}$<br>$y = (1 + \exp(40.8(RNA - seq)))^{-1}$                                                                                                                           |
| Linear          | $\alpha_0 : 0.317$<br>$\alpha_2 : -0.005$<br>$\alpha_1 : 4.081$ | $p_{\alpha_0} : 0.1926$<br>$p_{\alpha_2} : 0.137$<br>$p_{\alpha_1} : 0.000507$ | Not Statistically Significant integration<br>$y = 0.317(CNV) - 0.005(RNA - seq) + 4.081(DNA - met)$<br>$y = 0.317(CNV) + 4.081(DNA - met)$<br>$y = -0.005(RNA_{seq}) + 4.081(DNA - met)$<br>$y = -0.005(RNA - seq)$<br>$y = 4.081(DNA - met)$                                                                          |
| Logistic        | $\beta_0 : 12$<br>$\beta_2 : -47.2$<br>$\beta_1 : 81.4$         | $p_{\beta_0} : 0.29$<br>$p_{\beta_2} : 0.154$<br>$p_{\beta_1} : 0.152$         | Not Statistically Significant integration<br>$y = (1 + \exp(-12(CNV) + 47.2(RNA - seq) - 81.4(DNA - met)))^{-1}$<br>$y = 1/(1 + \exp(-12(CNV) + 47.2 (RNA - seq)))^{-1}$<br>$y = 1/(1 + \exp(47.2(RNA - seq) - 81.4(DNA - met)))$<br>$y = (1 + \exp(47.2(RNA - seq)))^{-1}$<br>$y = (1 + \exp(-81.4(DNA - met)))^{-1}$ |

**Supplementary Table S3. Autoencoder architecture.**

| <b>Encoder</b>  |             | <b>Decoder</b>  |             |
|-----------------|-------------|-----------------|-------------|
| Fully connected | (1209, 512) | Fully connected | (400, 512)  |
| Fully connected | (512, 400)  | Fully connected | (512, 1209) |

**Supplementary Table S4. Silhouette score and variance of Autoencoder and random stacking using regression analysis with different number of PCs.**

| <i>Autoencoder</i>         |                 |                         |
|----------------------------|-----------------|-------------------------|
| <b>Principal Component</b> | <b>Variance</b> | <b>Silhouette Score</b> |
| PC = 2                     | 0.6305          | 0.7602                  |
| PC = 4                     | 0.7655          | 0.6643                  |
| PC = 20                    | 0.9571          | 0.5664                  |
| PC = 100                   | 0.9946          | 0.5576                  |
| PC = 300                   | 0.9999          | 0.5554                  |
| <i>Random Stacking</i>     |                 |                         |
| PC=2                       | 0.6040          | 0.7144                  |
| PC=4                       | 0.7160          | 0.6311                  |
| PC=20                      | 0.8128          | 0.5753                  |
| PC=100                     | 0.9065          | 0.5326                  |
| PC=300                     | 0.9838          | 0.5017                  |
